# Supplementary material
Source: PubMed Central journal article supplement (PMC4936479)
Supplement: NIHMS797124-supplement-Supplemetal_appendix_AZA___LEN.pdf [file NIHMS797124-supplement-Supplemetal_appendix_AZA___LEN.pdf]

## Supplementary appendix

This appendix formed part of the original submission and has been peer reviewed. We post it as supplied by the authors.

Supplement to: DiNardo CD, Daver N, Jabbour E, et al. Sequential azacitidine and lenalidomide in patients with high-risk myelodysplastic syndromes and acute myeloid leukaemia: a single-arm, phase 1/2 study. *Lancet Haematol* 2014; published online Dec 22. [http://dx.doi.org/10.1016/S2352-3026\(14\)00026-X](http://dx.doi.org/10.1016/S2352-3026(14)00026-X).

**Supplemental Table 1:**

Phase II cohort analysis

(a) univariate modeling

(b) multivariate modeling (with and without platelet count included in model)

(a)

|             | N  | Med (wks) | p-value      |
|-------------|----|-----------|--------------|
| Age         |    |           |              |
| <65         | 23 | 62        |              |
| >/=65       | 37 | 55        | 0.19         |
| ANC         |    |           |              |
| >/=1000     | 23 | NR        |              |
| <1000       | 37 | 55        | 0.28         |
| Plt         |    |           |              |
| >/=50       | 25 | 62        |              |
| <50         | 35 | 32        | <b>0.059</b> |
| Dose        |    |           |              |
| 25          | 40 | 74        |              |
| >25         | 20 | 21        | <b>0.001</b> |
| BM BI       |    |           |              |
| <20         | 36 | 60        |              |
| >/=20       | 24 | 55        | 0.35         |
| Cyto        |    |           |              |
| Non-complex | 37 | 62        |              |
| Complex     | 19 | 24        | <b>0.02</b>  |

(b)

|        | Chi <sup>2</sup> = 14.8088 df = 3 p = .00199 |            |                      |                      |
|--------|----------------------------------------------|------------|----------------------|----------------------|
|        | p                                            | Risk ratio | Risk ratio 95% lower | Risk ratio 95% upper |
| N=56   |                                              |            |                      |                      |
| Plt-X  | 0.51                                         | 1.31       | 0.59                 | 2.88                 |
| Dose-X | <b>&lt;0.01</b>                              | 2.72       | 1.34                 | 5.49                 |
| CG-XX  | <b>0.02</b>                                  | 2.53       | 1.14                 | 5.64                 |

|        | Chi <sup>2</sup> = 14.3597 df = 2 p = .00076 |            |                      |                      |
|--------|----------------------------------------------|------------|----------------------|----------------------|
|        | p                                            | Risk ratio | Risk ratio 95% lower | Risk ratio 95% upper |
| N=56   |                                              |            |                      |                      |
| Dose-X | <b>&lt;0.01</b>                              | 2.78       | 1.38                 | 5.61                 |
| CG-XX  | <b>&lt;0.01</b>                              | 2.77       | 1.30                 | 5.93                 |



**Supplemental Table 2: Somatic Molecular Analysis: Coverage by gene and codon(s) tested for adequate amplicons**

| <u>Gene</u>               | <u>Exons (codons) tested</u>                                                                                                                                                                                                                                              |
|---------------------------|---------------------------------------------------------------------------------------------------------------------------------------------------------------------------------------------------------------------------------------------------------------------------|
| <i>ABL1</i> (NM_005157)   | 4-6 (243-362), 7 (395-424)                                                                                                                                                                                                                                                |
| <i>AKT1</i> (NM_005163)   | 3 (16-49)                                                                                                                                                                                                                                                                 |
| <i>ALK</i> (NM_004304)    | 23 (1172-1175), 25 (1248-1275)                                                                                                                                                                                                                                            |
| <i>APC</i> (NM_000038)    | 16 (875-918), 16 (1113-1153),<br>16 (1257-1297), 16 (1288-1328),<br>16 (1318-1357), 16 (1349-1386),<br>16 (1377-1575)                                                                                                                                                     |
| <i>ATM</i> (NM_000051)    | 8 (353-355), 9 (409-412), 12<br>(601-633), 17 (846-880), 26<br>(1308-1331), 34 (1678-1719), 35<br>(1741-1773), 36 (1792-1832), 39<br>(1940-1973), 50 (2441-2479), 54<br>(2665-2670), 55 (2694-2717), 56<br>(2725-2756), 59 (2889-2891), 61<br>(2946-2950), 63 (3007-3051) |
| <i>BRAF</i> (NM_004333)   | 11 (439-471), 15 (581-606)                                                                                                                                                                                                                                                |
| <i>CDH1</i> (NM_004360)   | 3 (77-117), 8 (369-379), 9 (399-<br>439)                                                                                                                                                                                                                                  |
| <i>CSF1R</i> (NM_005211)  | 7 (297-301), 22 (926-970)                                                                                                                                                                                                                                                 |
| <i>CTNNB1</i> (NM_001904) | 3 (12-50)                                                                                                                                                                                                                                                                 |
| <i>DNMT3A</i> (NM_022552) | 23 (866-913)                                                                                                                                                                                                                                                              |
| <i>EGFR</i> (NM_005228)   | 3 (108-142), 7 (288-297), 15<br>(598-627), 18-20 (708-817), 21<br>(857-875)                                                                                                                                                                                               |
| <i>ERBB2</i> (NM_004448)  | 19 (754-769), 20 (772-818), 21<br>(839-883)                                                                                                                                                                                                                               |
| <i>ERBB4</i> (NM_005235)  | 3 (98-140), 4 (153-186), 6 (208-<br>244), 7 (248-287), 8 (295-306), 9<br>(333-350), 15 (579-619), 23<br>(907-936)                                                                                                                                                         |
| <i>EZH2</i> (NM_004456)   | 16 (618-649)                                                                                                                                                                                                                                                              |
| <i>FBXW7</i> (NM_033632)  | 5 (243-278), 8 (375-394), 9 (429-<br>471), 10 (473-508), 11 (549-583)                                                                                                                                                                                                     |
| <i>FGFR1</i> (NM_015850)  | 4 (120-126), 7 (247-250)                                                                                                                                                                                                                                                  |
| <i>FGFR2</i> (NM_000141)  | 7 (250-311), 7 (302-313), 9 (362-<br>382), 12 (521-550)                                                                                                                                                                                                                   |
| <i>FGFR3</i> (NM_000142)  | 7 (247-288), 9 (379-422), 14-15<br>(639-659), 18 (792-807)                                                                                                                                                                                                                |
| <i>FLT3</i> (NM_004119)   | 11 (437-456), 14 (569-605), 16<br>(648-683), 20 (807-843)                                                                                                                                                                                                                 |
| <i>GNA11</i> (NM_002067)  | 4-5 (159-216), 6-7 (255-360)                                                                                                                                                                                                                                              |
| <i>GNAQ</i> (NM_002072)   | 4-5 (159-245), 5-6 (241-297), 6-<br>7 (291-360), 7 (355-360)                                                                                                                                                                                                              |
| <i>GNAS</i> (NM_000516)   | 8 (200-220)                                                                                                                                                                                                                                                               |
| <i>HNF1A</i> (NM_000545)  | 3 (205-238), 4 (271-314)                                                                                                                                                                                                                                                  |
| <i>HRAS</i> (NM_005343)   | 3 (38-63)                                                                                                                                                                                                                                                                 |
| <i>IDH1</i> (NM_005896)   | 4 (90-132)                                                                                                                                                                                                                                                                |
| <i>IDH2</i> (NM_002168)   | 4 (125-178)                                                                                                                                                                                                                                                               |
| <i>JAK2</i> (NM_004972)   | 14 (615-622)                                                                                                                                                                                                                                                              |
| <i>JAK3</i> (NM_000215)   | 13 (568-573), 16 (683-723)                                                                                                                                                                                                                                                |
| <i>KDR</i> (NM_002253)    | 6 (220-248), 7 (267-276), 11<br>(471-476), 19 (872-874), 21<br>(946-985), 26 (1135-1146), 27<br>(1171-1211), 30 (1308-1357)                                                                                                                                               |
| <i>KIT</i> (NM_000222)    | 2 (51-93), 9-10 (502-547), 10-11<br>(540-592), 13 (641-664), 14<br>(670-712), 15 (714-745), 17<br>(815-828), 18 (838-866)                                                                                                                                                 |
| <i>KLHL6</i> (NM_130446)  | 1 (1-98)                                                                                                                                                                                                                                                                  |
| <i>KRAS</i> (NM_004985)   | 2 (1-22), 3 (38-63), 4 (103-147)                                                                                                                                                                                                                                          |

|                            |                                                                                                                     |
|----------------------------|---------------------------------------------------------------------------------------------------------------------|
| <i>MET</i> (NM_001127500)  | 2 (168-209), 2 (375-400), 14<br>(1008-1028), 16 (1110-1132), 19<br>(1247-1284)                                      |
| <i>MLH1</i> (NM_000249)    | 12 (383-426)                                                                                                        |
| <i>MPL</i> (NM_005373)     | 10 (514-522)                                                                                                        |
| <i>NOTCH1</i> (NM_017617)  | 26 (1562-1601), 27 (1673-1679)                                                                                      |
| <i>NPM1</i> (NM_002520)    | 11 (283-295)                                                                                                        |
| <i>NRAS</i> (NM_002524)    | 2 (1-18), 3 (38-62)                                                                                                 |
| <i>PDGFRA</i> (NM_006206)  | 12 (552-592), 14 (659-668), 15<br>(673-717), 18 (823-854)                                                           |
| <i>PIK3CA</i> (NM_006218)  | 2 (83-118), 5 (345-353), 8 (418-<br>445), 10 (538-555), 14 (701-<br>729), 21 (988-1069)                             |
| <i>PTEN</i> (NM_000314)    | 1 (5-27), 3 (67-70), 6 (170-210),<br>7 (212-266), 8 (287-342)                                                       |
| <i>PTPN11</i> (NM_002834)  | 3 (59-104), 13 (501-533)                                                                                            |
| <i>RB1</i> (NM_000321)     | 4 (127-158), 6 (199-203), 11<br>(357-376), 18 (570-605), 20<br>(659-700), 21 (703-733), 22<br>(746-775)             |
| <i>RET</i> (NM_020975)     | 10-11 (610-667), 13 (766-798),<br>15 (880-910), 16 (918-934)                                                        |
| <i>SMAD4</i> (NM_005359)   | 3 (119-142), 5 (167-208), 6 (243-<br>263), 8 (310-319), 9 (329-373),<br>10 (385-424), 11 (443-480), 12<br>(496-535) |
| <i>SMARCB1</i> (NM_003073) | 2 (39-78), 4 (156-167), 5 (199-<br>210), 9 (381-386)                                                                |
| <i>SMO</i> (NM_005631)     | 3 (197-242), 5 (323-366), 6 (403-<br>422), 9 (533-551), 11 (639-646)                                                |
| <i>SRC</i> (NM_005417)     | 14 (530-537)                                                                                                        |
| <i>STK11</i> (NM_000455)   | 1 (36-77), 4-5 (193-211), 6 (261-<br>288), 8 (332-370)                                                              |
| <i>TP53</i> (NM_000546)    | 2 (1-12), 4 (69-112), 5 (126-<br>186), 5-6 (181-192), 6 (187-223),<br>6-7 (214-253), 8 (267-306), 10<br>(332-342)   |
| <i>VHL</i> (NM_000551)     | 2 (129-155), 3 (157-200)                                                                                            |
| <i>XPO1</i> (NM_003400)    | 14-15 (501-575)                                                                                                     |

**Supplemental Table 3. Overview of statistical methods used to assess Kaplan-Meier survival curves**

| p-value test              | Gr 1a   | Gr 1b: Ph I<br>vs. Ph IIb | Gr 1b: Ph I<br>vs. Ph IIa |
|---------------------------|---------|---------------------------|---------------------------|
| Gehan's<br>Wilcoxon       | 0.00498 | 0.653                     | 0.00022                   |
| Cox's F Test              | 0.00285 | 0.364                     | 0.00005                   |
| Cox-Mantell               | 0.04305 | 0.783                     | 0.00072                   |
| Peto & Peto's<br>Wilcoxon | 0.00985 | 0.644                     | 0.00043                   |
| Log rank (our<br>usual)   | 0.05617 | 0.781                     | 0.00164                   |
